# Supplementary material for: An ultra-fast reaction process for recycling lithium ion batteries via galvanic cell interaction
Source: Royal Society of Chemistry journal article supplement (doi:10.1039/d4sc06076h), 2024-11-18
Supplement: d4sc06076h1.pdf [file d4sc06076h1.pdf]

## **Supporting Information**

### **An Ultra-fast Reaction Process for Recycling Lithium Ion Batteries *via* Galvanic Cell Interaction**

*National Engineering Laboratory for High-Efficiency Recovery of Refractory Nonferrous Metals,  
School of Metallurgy and Environment, Central South University, Changsha 410083, PR China*

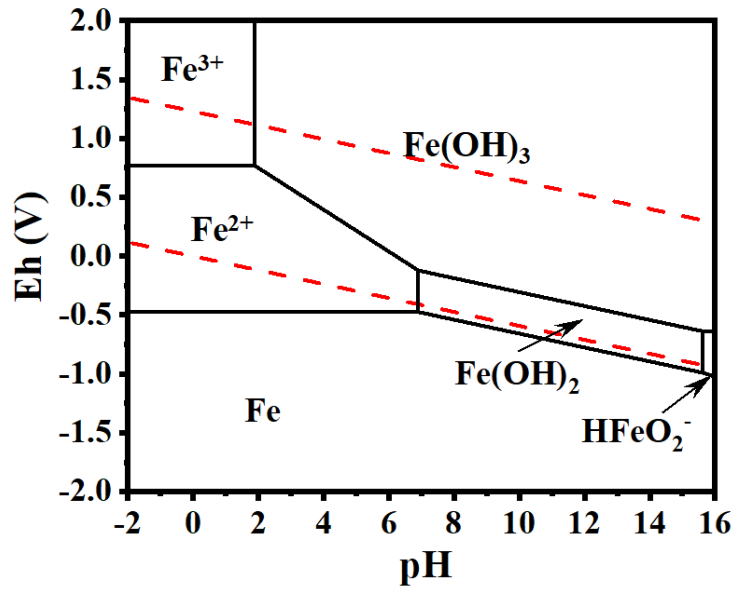

Figure S1. The Pourbaix diagram of Fe-H<sub>2</sub>O.

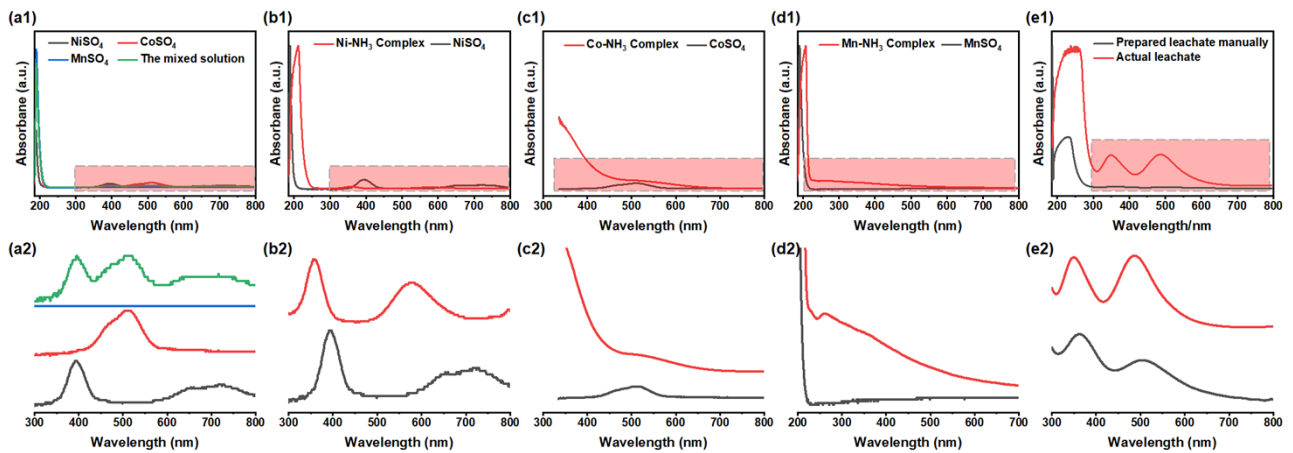

Figure S2. The UV-vis results of (a1-d1 and a2-d2) Ni<sup>2+</sup>, Co<sup>2+</sup>, Mn<sup>2+</sup> in two medias of water and leaching reagent, (e1 and e2) the actual leachate and prepared leachate manually.

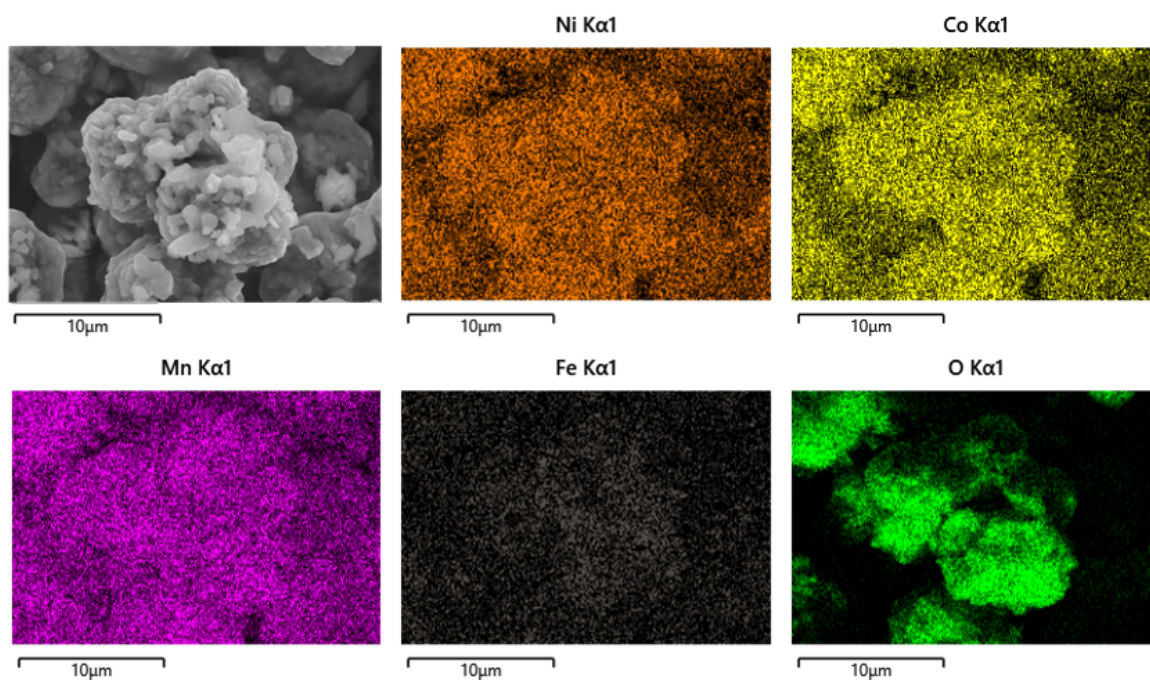

**Figure S3.** The EDS iamges for the NCM111 electrode after the external circuit detection test.

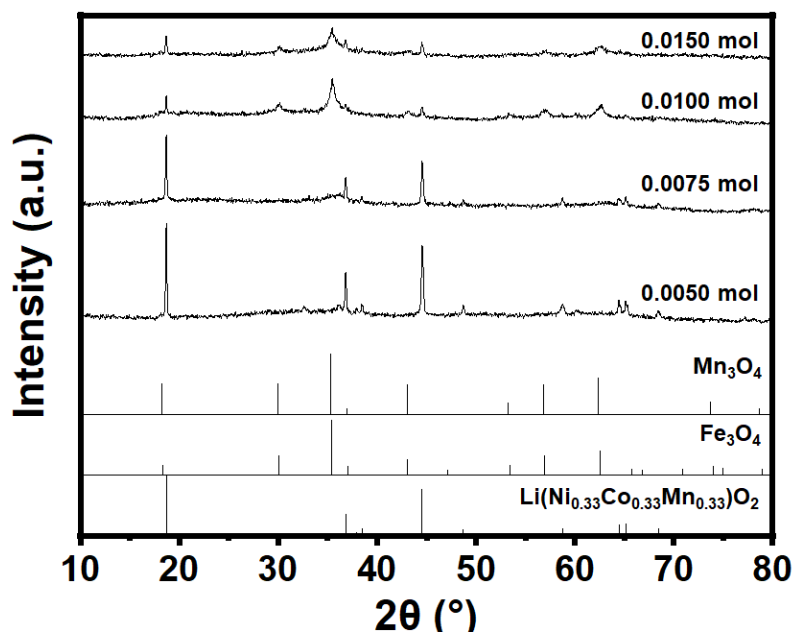

**Figure S4.** The XRD patterns of the leaching residues vary with a gradient of  $\text{FeSO}_4$  usage.

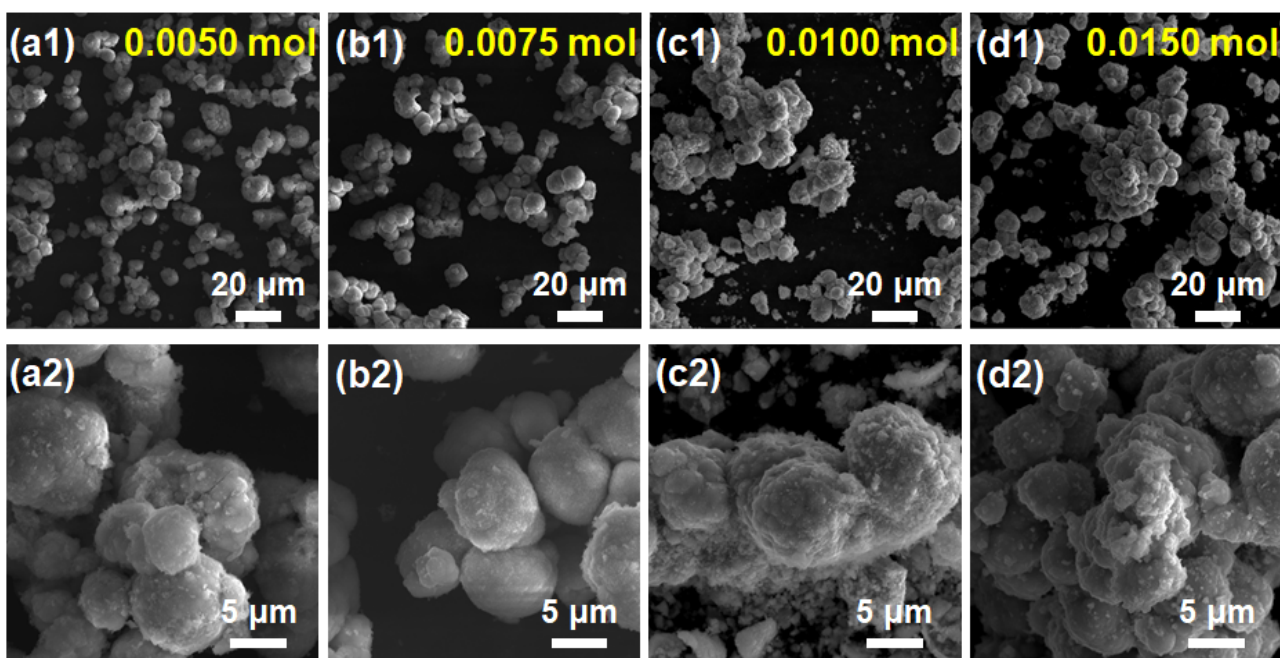

Figure S5. The SEM images of the leaching residues vary with a gradient of  $\text{FeSO}_4$  usage.

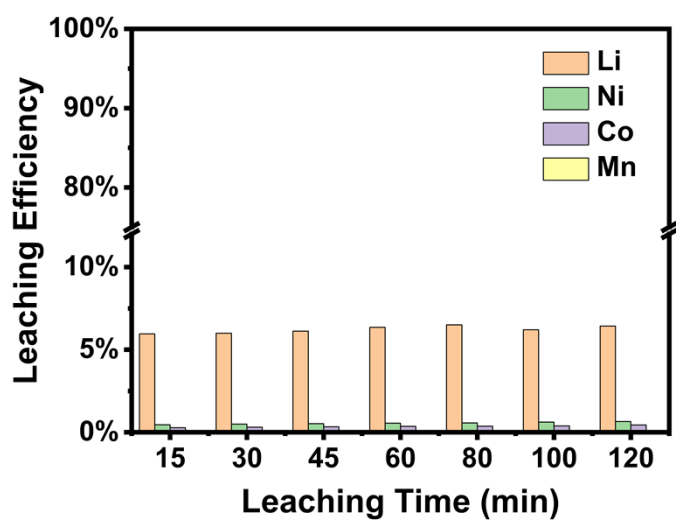

Figure S6. The leaching results without adding  $\text{FeSO}_4$ .

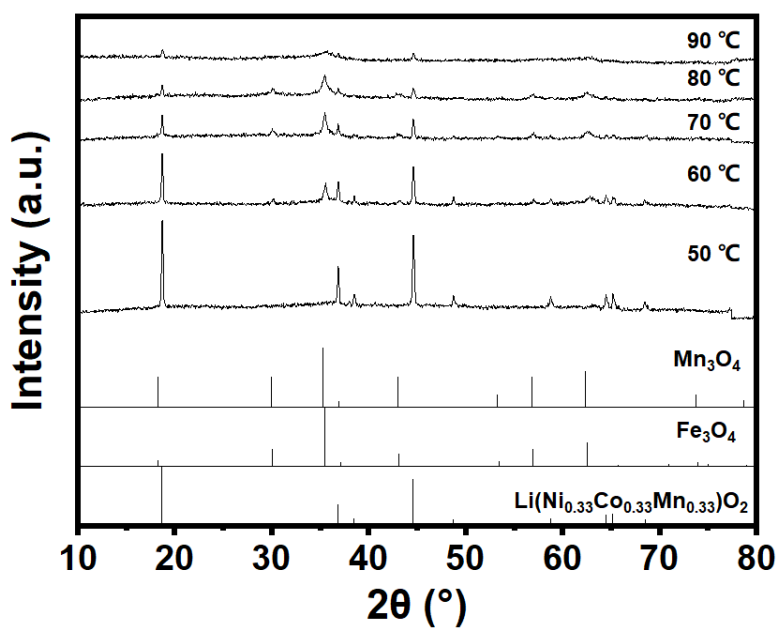

**Figure S7.** The XRD patterns of the leaching residues vary with a temperature gradient.

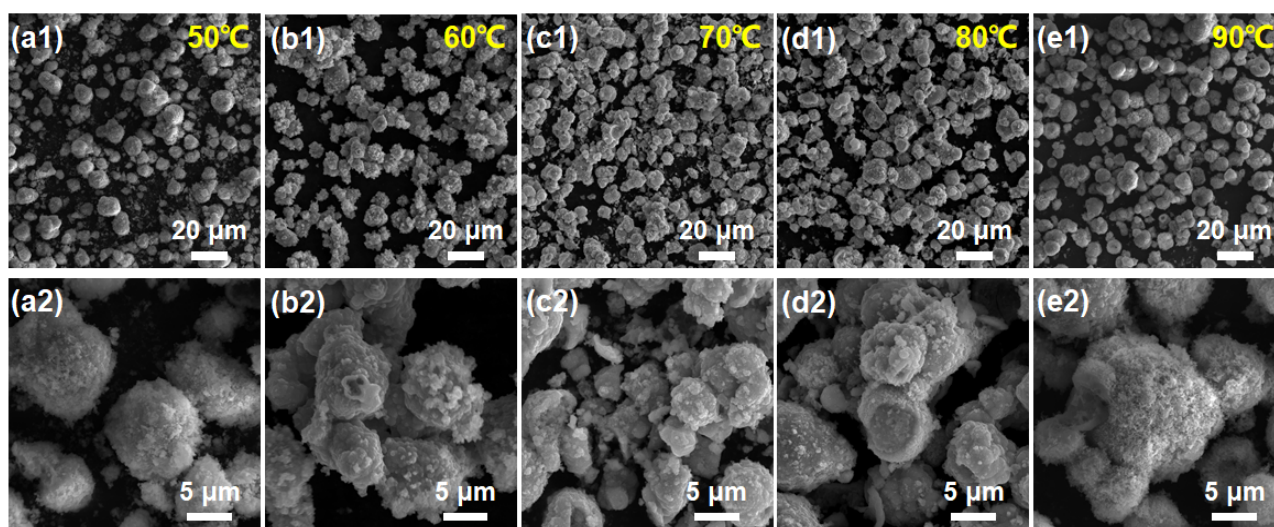

**Figure S8.** The SEM images of the leaching residues with a temperature gradient.

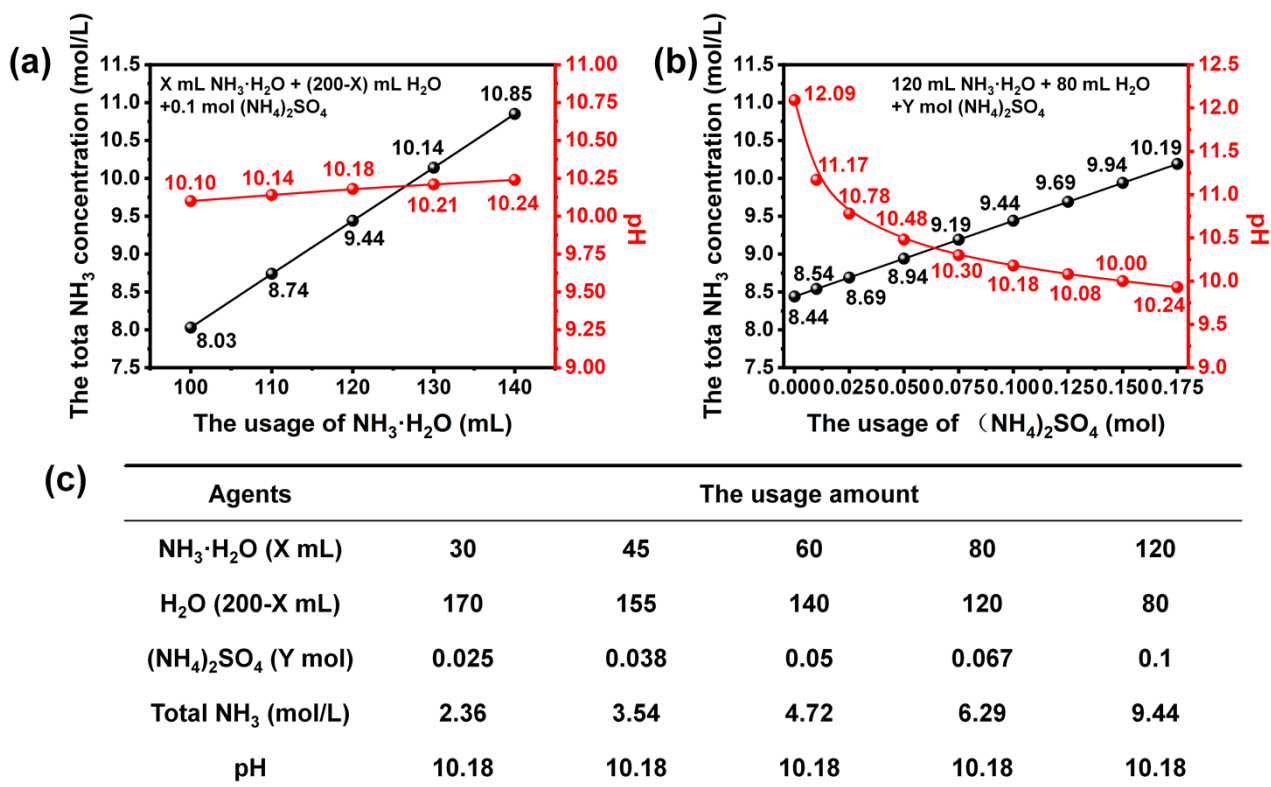

**Figure S9.** The changes of pH and total NH<sub>3</sub> concentration with elevated usage of (a) NH<sub>3</sub>·H<sub>2</sub>O and (b) (NH<sub>4</sub>)<sub>2</sub>SO<sub>4</sub>. (c) The changes as adjusting NH<sub>3</sub>·H<sub>2</sub>O and (NH<sub>4</sub>)<sub>2</sub>SO<sub>4</sub> in equal proportion.

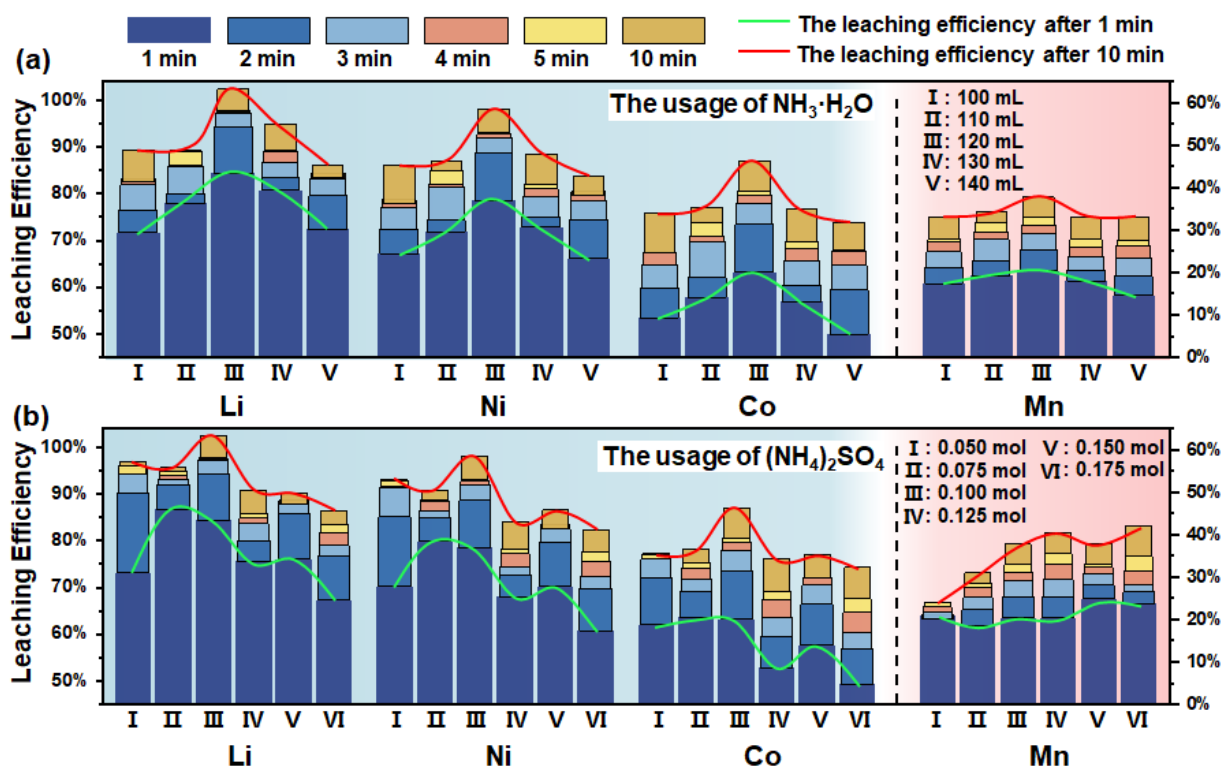

**Figure S10.** The leaching efficiency of valuable metals changes with the gradient of (a) NH<sub>3</sub>·H<sub>2</sub>O usage, and (b) (NH<sub>4</sub>)<sub>2</sub>SO<sub>4</sub> usage.

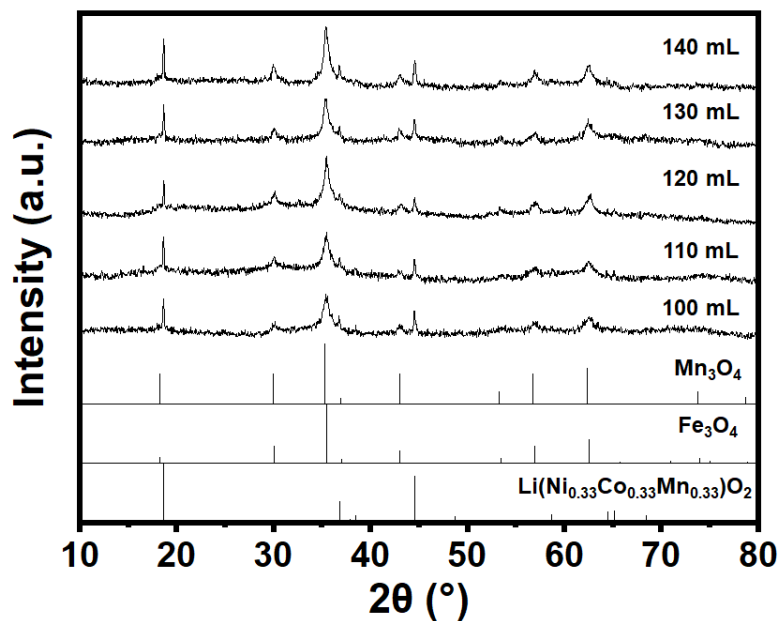

**Figure S11.** The XRD patterns of the leaching residues vary with a gradient of  $\text{NH}_3 \cdot \text{H}_2\text{O}$  usage.

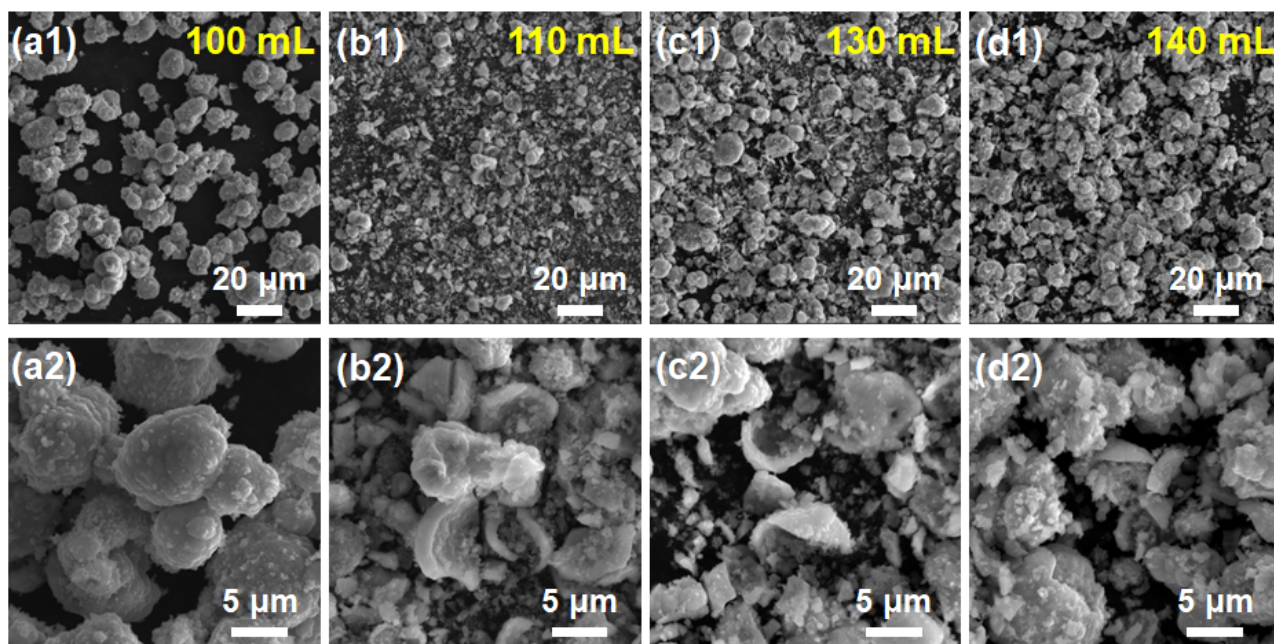

**Figure S12.** The SEM images of the leaching residues vary with a gradient of  $\text{NH}_3 \cdot \text{H}_2\text{O}$  usage.

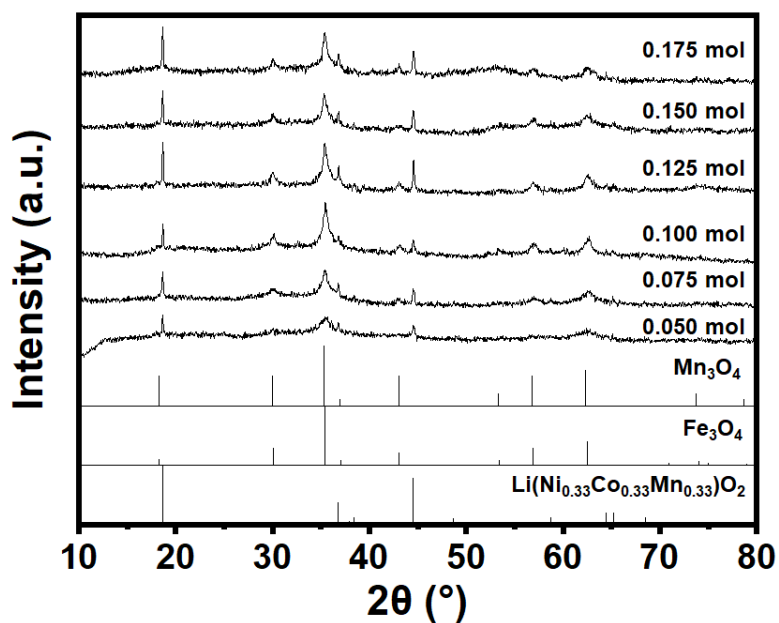

**Figure S13.** The XRD patterns of the leaching residues vary with a gradient of  $(\text{NH}_4)_2\text{SO}_4$  usage.

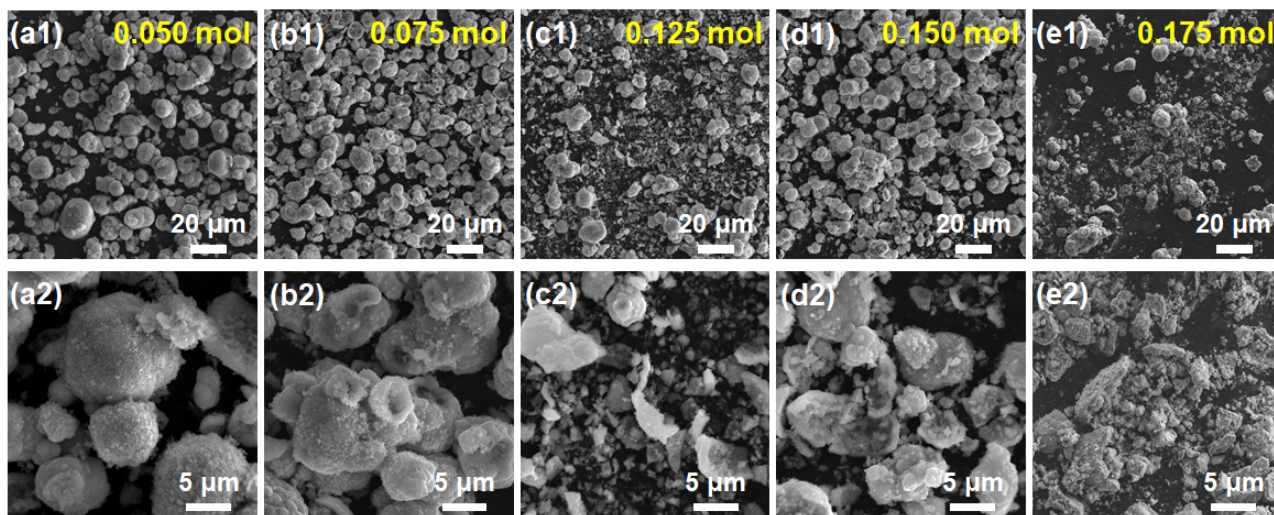

**Figure S14.** The SEM images of the leaching residues vary with a gradient of  $(\text{NH}_4)_2\text{SO}_4$  usage.



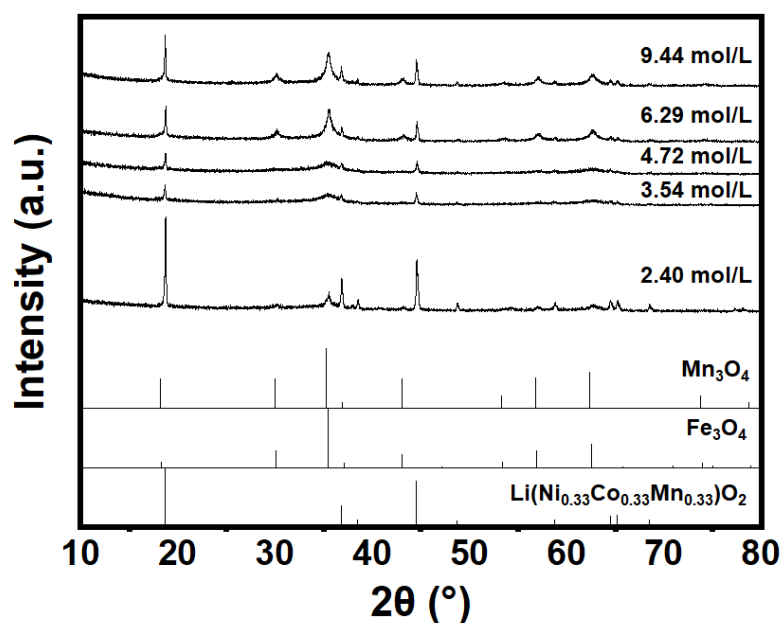

**Figure S15.** The XRD patterns of the leaching residues vary with a gradient in the concentration of  $\text{NH}_3$ .

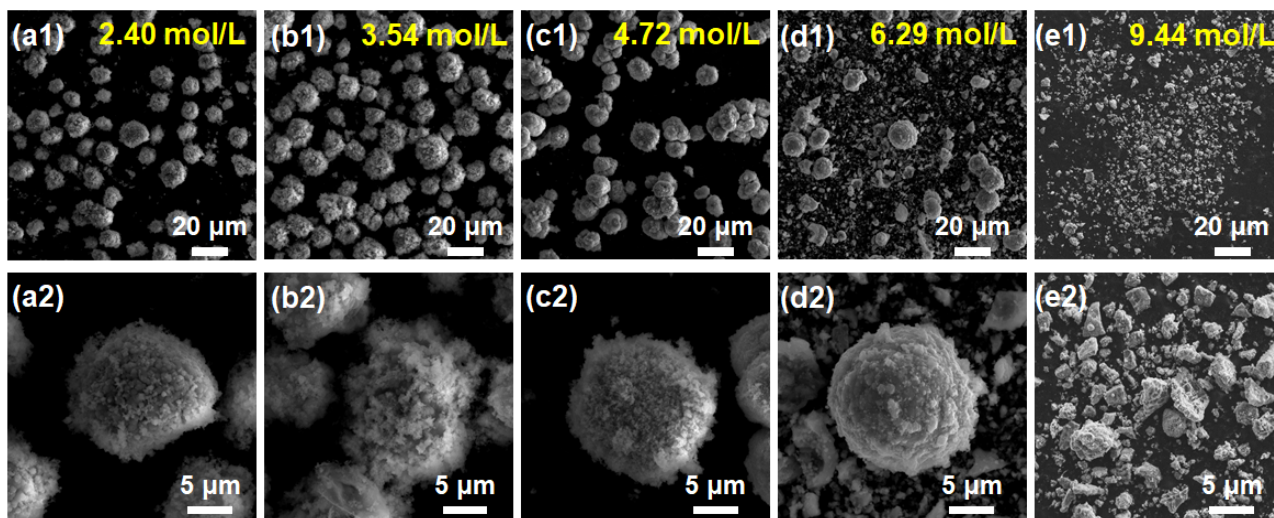

**Figure S16.** The SEM images of the leaching residues vary with a gradient in the concentration of  $\text{NH}_3$ .

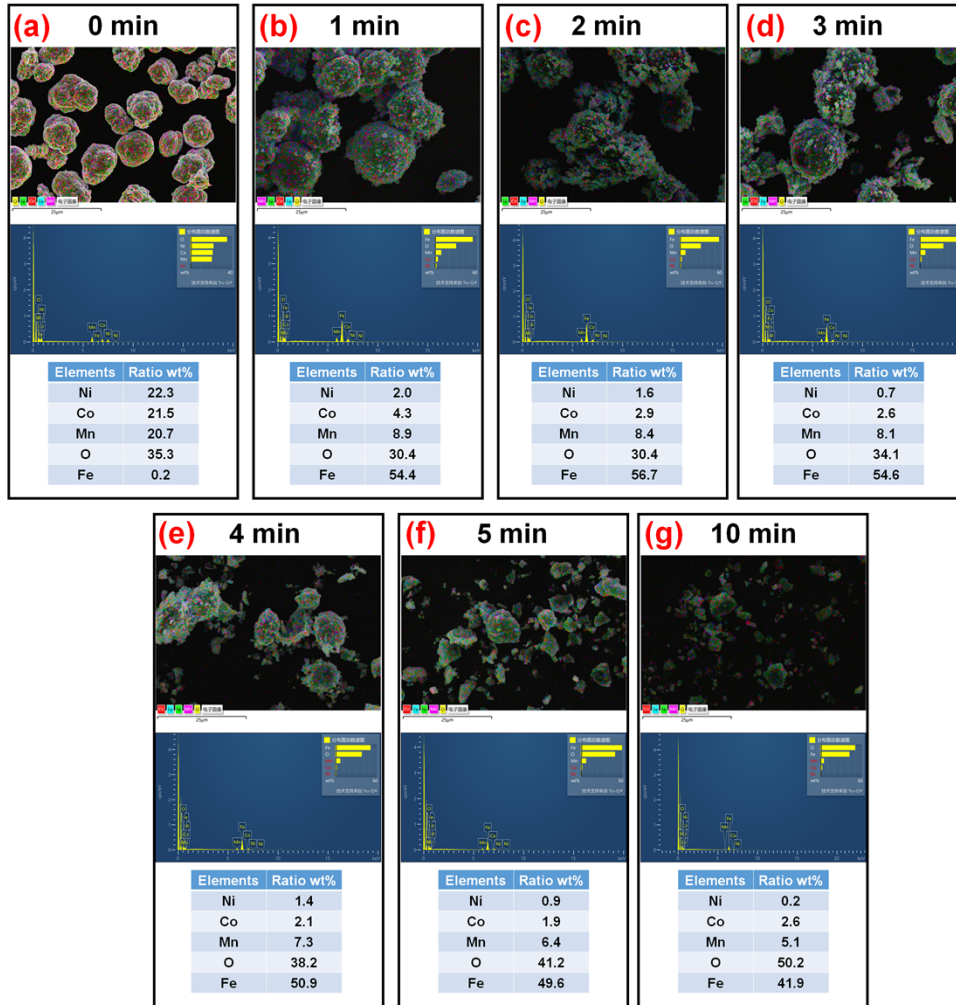

**Figure S17.** The EDS tests for the leaching residues at (a) 0 min, (b) 1 min, (c) 2 min, (d) 3 min, (e) 4 min, (f) 5 min, (g) 10 min.

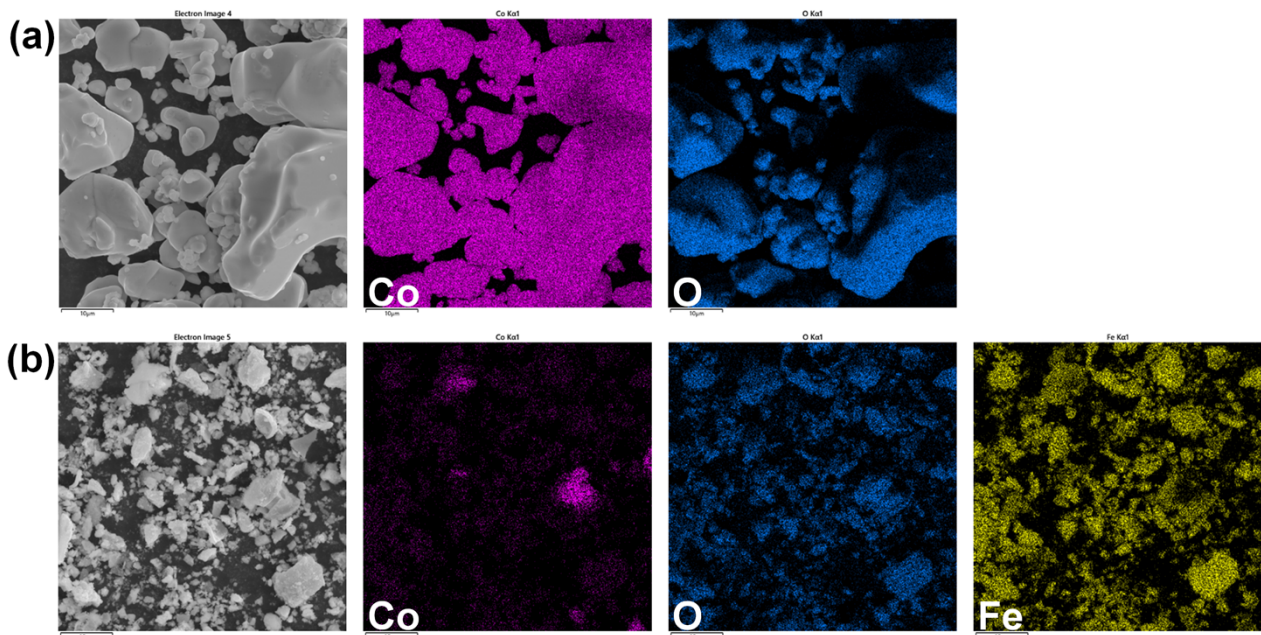

**Figure S18.** The EDS test of the LCO (a) before and (b) after leaching

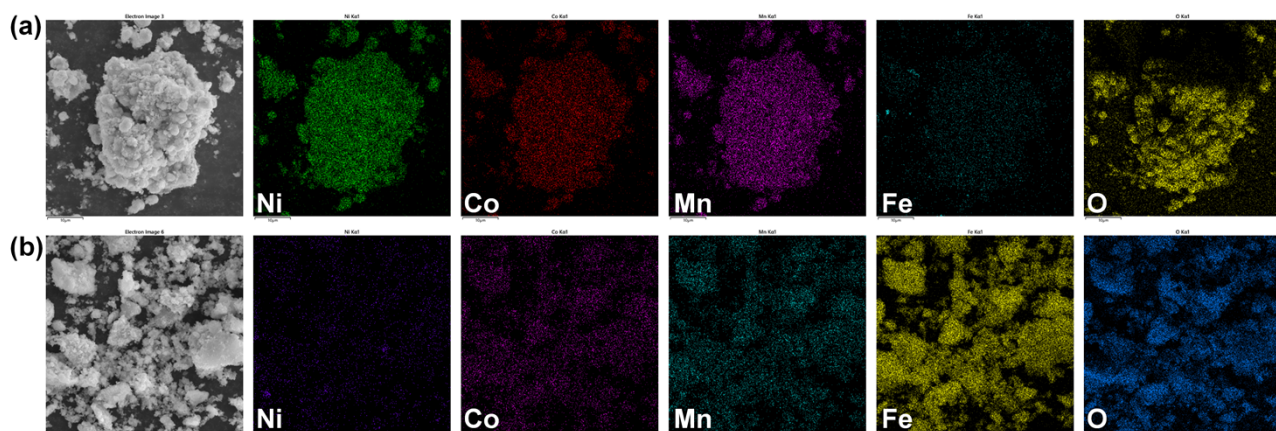

**Figure S19.** The EDS test of the NCM622 (a) before and (b) after leaching

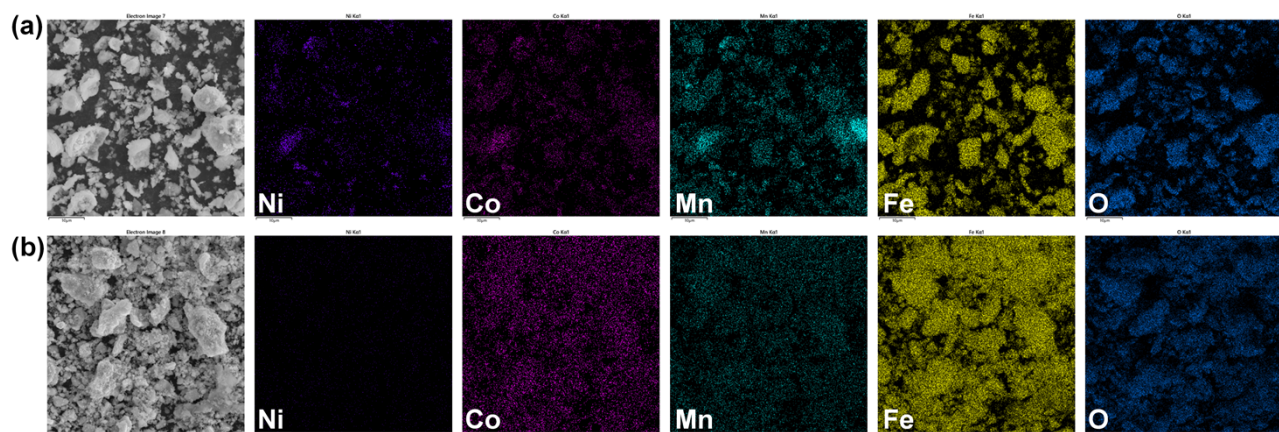

**Figure S20.** The EDS test of the two steps leaching: the (a) first and (b) second leaching residues

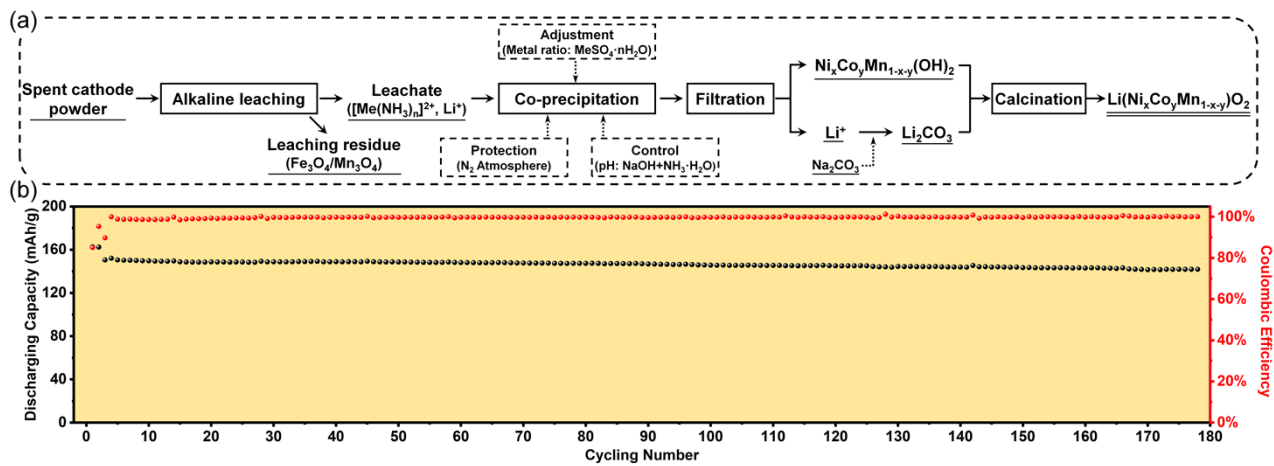

**Figure S21.** (a) The regeneration process. (b) The long-term cycling performance of regenerated NCM523 material

**Table S1.** The related information for Ni-H<sub>2</sub>O Pourbaix diagram

| Number | Chemical Equation                                                                                   | The calculated line when T = 298.15K |
|--------|-----------------------------------------------------------------------------------------------------|--------------------------------------|
| a      | $2\text{H}^+ + 2\text{e}^- = \text{H}_2$                                                            | $E = -0.059 \cdot \text{pH}$         |
| b      | $\text{O}_2 + 4\text{H}^+ + 4\text{e}^- = 2\text{H}_2\text{O}$                                      | $E = 1.229 - 0.059 \cdot \text{pH}$  |
| 1      | $\text{Ni}^{3+} + \text{e}^- = \text{Ni}^{2+}$                                                      | $E = 1.840$                          |
| 2      | $\text{Ni}^{2+} + 2\text{e}^- = \text{Ni}$                                                          | $E = -0.236$                         |
| 3      | $\text{Ni}_2\text{O}_3 + 6\text{H}^+ = 2\text{Ni}^{3+} + 3\text{H}_2\text{O}$                       | $\text{pH} = -0.646$                 |
| 4      | $\text{Ni}(\text{OH})_2 + 2\text{H}^+ = \text{Ni}^{2+} + 2\text{H}_2\text{O}$                       | $\text{pH} = 6.357$                  |
| 5      | $\text{Ni}_3\text{O}_4 + 2\text{H}_2\text{O} + 2\text{H}^+ + 2\text{e}^- = 3\text{Ni}(\text{OH})_2$ | $E = 0.807 - 0.059 \cdot \text{pH}$  |
| 6      | $\text{Ni}_3\text{O}_4 + 8\text{H}^+ + 2\text{e}^- = 3\text{Ni}^{2+} + 4\text{H}_2\text{O}$         | $E = 1.935 - 0.237 \cdot \text{pH}$  |
| 7      | $\text{Ni}(\text{OH})_2 + 2\text{H}^+ + 2\text{e}^- = \text{Ni} + 2\text{H}_2\text{O}$              | $E = 0.140 - 0.059 \cdot \text{pH}$  |
| 8      | $\text{Ni}_2\text{O}_3 + 6\text{H}^+ + 2\text{e}^- = 2\text{Ni}^{2+} + 3\text{H}_2\text{O}$         | $E = 1.725 - 0.178 \cdot \text{pH}$  |
| 9      | $3\text{Ni}_2\text{O}_3 + 2\text{H}^+ + 2\text{e}^- = 2\text{Ni}_3\text{O}_4 + \text{H}_2\text{O}$  | $E = 1.305 - 0.059 \cdot \text{pH}$  |

**Table S2.** The related information for Co-H<sub>2</sub>O Pourbaix diagram

| Number | Chemical Equation                                                                                   | The calculated line when T = 298.15K |
|--------|-----------------------------------------------------------------------------------------------------|--------------------------------------|
| a      | $2\text{H}^+ + 2\text{e}^- = \text{H}_2$                                                            | $E = -0.059 \cdot \text{pH}$         |
| b      | $\text{O}_2 + 4\text{H}^+ + 4\text{e}^- = 2\text{H}_2\text{O}$                                      | $E = 1.229 - 0.059 \cdot \text{pH}$  |
| 1      | $\text{Co}^{3+} + \text{e}^- = \text{Co}^{2+}$                                                      | $E = 1.953$                          |
| 2      | $\text{Co}^{2+} + 2\text{e}^- = \text{Co}$                                                          | $E = -0.282$                         |
| 3      | $\text{Co}_2\text{O}_3 + 6\text{H}^+ = 2\text{Co}^{3+} + 3\text{H}_2\text{O}$                       | $\text{pH} = -3.348$                 |
| 4      | $\text{Co}(\text{OH})_2 + 2\text{H}^+ = \text{Co}^{2+} + 2\text{H}_2\text{O}$                       | $\text{pH} = 6.530$                  |
| 5      | $\text{Co}_3\text{O}_4 + 2\text{H}_2\text{O} + 2\text{H}^+ + 2\text{e}^- = 3\text{Co}(\text{OH})_2$ | $E = 0.485 - 0.059 \cdot \text{pH}$  |
| 6      | $\text{Co}_3\text{O}_4 + 8\text{H}^+ + 2\text{e}^- = 3\text{Co}^{2+} + 4\text{H}_2\text{O}$         | $E = 1.644 - 0.237 \cdot \text{pH}$  |
| 7      | $\text{Co}(\text{OH})_2 + 2\text{H}^+ + 2\text{e}^- = \text{Co} + 2\text{H}_2\text{O}$              | $E = 0.104 - 0.059 \cdot \text{pH}$  |
| 8      | $\text{Co}_2\text{O}_3 + 6\text{H}^+ + 2\text{e}^- = 2\text{Co}^{2+} + 3\text{H}_2\text{O}$         | $E = 1.358 - 0.178 \cdot \text{pH}$  |
| 9      | $3\text{Co}_2\text{O}_3 + 2\text{H}^+ + 2\text{e}^- = 2\text{Co}_3\text{O}_4 + \text{H}_2\text{O}$  | $E = 0.786 - 0.059 \cdot \text{pH}$  |

**Table S3.** The related information for Mn-H<sub>2</sub>O Pourbaix diagram

| Number | Chemical Equation                                                                                   | The calculated line when T = 298.15K |
|--------|-----------------------------------------------------------------------------------------------------|--------------------------------------|
| a      | $2\text{H}^+ + 2\text{e}^- = \text{H}_2$                                                            | $E = -0.059 \cdot \text{pH}$         |
| b      | $\text{O}_2 + 4\text{H}^+ + 4\text{e}^- = 2\text{H}_2\text{O}$                                      | $E = 1.229 - 0.059 \cdot \text{pH}$  |
| 1      | $\text{Mn}^{3+} + \text{e}^- = \text{Mn}^{2+}$                                                      | $E = 1.542$                          |
| 2      | $\text{Mn}^{2+} + 2\text{e}^- = \text{Mn}$                                                          | $E = -1.182$                         |
| 3      | $\text{MnO}_2 + 4\text{H}^+ + 2\text{e}^- = 2\text{Mn}^{2+} + 3\text{H}_2\text{O}$                  | $E = 1.229 - 0.118 \cdot \text{pH}$  |
| 4      | $\text{Mn}(\text{OH})_2 + 2\text{H}^+ = \text{Mn}^{2+} + 2\text{H}_2\text{O}$                       | $\text{pH} = 7.282$                  |
| 5      | $\text{Mn}_3\text{O}_4 + 2\text{H}_2\text{O} + 2\text{H}^+ + 2\text{e}^- = 3\text{Mn}(\text{OH})_2$ | $E = 0.519 - 0.059 \cdot \text{pH}$  |
| 6      | $\text{Mn}_3\text{O}_4 + 8\text{H}^+ + 2\text{e}^- = 3\text{Mn}^{2+} + 4\text{H}_2\text{O}$         | $E = 1.812 - 0.237 \cdot \text{pH}$  |
| 7      | $\text{Mn}(\text{OH})_2 + 2\text{H}^+ + 2\text{e}^- = \text{Mn} + 2\text{H}_2\text{O}$              | $E = -0.751 - 0.059 \cdot \text{pH}$ |
| 8      | $2\text{MnO}_2 + 2\text{H}^+ + 2\text{e}^- = \text{Mn}_2\text{O}_3 + \text{H}_2\text{O}$            | $E = 0.974 - 0.059 \cdot \text{pH}$  |
| 9      | $\text{Mn}_2\text{O}_3 + 6\text{H}^+ + 2\text{e}^- = 2\text{Mn}^{2+} + 3\text{H}_2\text{O}$         | $E = 1.484 - 0.178 \cdot \text{pH}$  |
| 10     | $3\text{Mn}_2\text{O}_3 + 2\text{H}^+ + 2\text{e}^- = 2\text{Mn}_3\text{O}_4 + \text{H}_2\text{O}$  | $E = 0.829 - 0.059 \cdot \text{pH}$  |
| 11     | $\text{MnO}_4^- + \text{e}^- = \text{MnO}_4^{2-}$                                                   | $E = 0.554$                          |
| 12     | $\text{MnO}_4^- + 4\text{H}^+ + 3\text{e}^- = \text{MnO}_2 + 2\text{H}_2\text{O}$                   | $E = 1.700 - 0.079 \cdot \text{pH}$  |
| 13     | $\text{MnO}_4^{2-} + 2\text{e}^- + 4\text{H}^+ = \text{MnO}_2 + 2\text{H}_2\text{O}$                | $E = 2.273 - 0.118 \cdot \text{pH}$  |

**Table S4.** The related information for Fe-H<sub>2</sub>O Pourbaix diagram

| Number | Chemical Equation                                                                                   | The calculated line when T = 298.15K |
|--------|-----------------------------------------------------------------------------------------------------|--------------------------------------|
| a      | $2\text{H}^+ + 2\text{e}^- = \text{H}_2$                                                            | $E = -0.059 \cdot \text{pH}$         |
| b      | $\text{O}_2 + 4\text{H}^+ + 4\text{e}^- = 2\text{H}_2\text{O}$                                      | $E = 1.229 - 0.059 \cdot \text{pH}$  |
| 1      | $\text{Co}^{3+} + \text{e}^- = \text{Co}^{2+}$                                                      | $E = 1.953$                          |
| 2      | $\text{Co}^{2+} + 2\text{e}^- = \text{Co}$                                                          | $E = -0.282$                         |
| 3      | $\text{Co}_2\text{O}_3 + 6\text{H}^+ = 2\text{Co}^{3+} + 3\text{H}_2\text{O}$                       | $\text{pH} = -3.348$                 |
| 4      | $\text{Co}(\text{OH})_2 + 2\text{H}^+ = \text{Co}^{2+} + 2\text{H}_2\text{O}$                       | $\text{pH} = 6.530$                  |
| 5      | $\text{Co}_3\text{O}_4 + 2\text{H}_2\text{O} + 2\text{H}^+ + 2\text{e}^- = 3\text{Co}(\text{OH})_2$ | $E = 0.485 - 0.059 \cdot \text{pH}$  |
| 6      | $\text{Co}_3\text{O}_4 + 8\text{H}^+ + 2\text{e}^- = 3\text{Co}^{2+} + 4\text{H}_2\text{O}$         | $E = 1.644 - 0.237 \cdot \text{pH}$  |
| 7      | $\text{Co}(\text{OH})_2 + 2\text{H}^+ + 2\text{e}^- = \text{Co} + 2\text{H}_2\text{O}$              | $E = 0.104 - 0.059 \cdot \text{pH}$  |
| 8      | $\text{Co}_2\text{O}_3 + 6\text{H}^+ + 2\text{e}^- = 2\text{Co}^{2+} + 3\text{H}_2\text{O}$         | $E = 1.358 - 0.178 \cdot \text{pH}$  |
| 9      | $3\text{Co}_2\text{O}_3 + 2\text{H}^+ + 2\text{e}^- = 2\text{Co}_3\text{O}_4 + \text{H}_2\text{O}$  | $E = 0.786 - 0.059 \cdot \text{pH}$  |

**Table S5.** The leaching efficiency of five independent experiment

| Element | Time/min | Leaching efficiency |         |         |         |         | Average | SD      |
|---------|----------|---------------------|---------|---------|---------|---------|---------|---------|
| Li      | 1        | 0.801               | 0.84304 | 0.89804 | 0.77954 | 0.75744 | 0.81581 | 0.05578 |
|         | 2        | 0.85976             | 0.94167 | 0.95961 | 0.84909 | 0.83756 | 0.88954 | 0.05668 |
|         | 3        | 0.93056             | 0.97233 | 0.9572  | 0.89394 | 0.90057 | 0.93092 | 0.03426 |
|         | 4        | 0.89009             | 0.97323 | 0.95906 | 0.94032 | 0.93412 | 0.93936 | 0.03159 |
|         | 5        | 0.96797             | 0.97804 | 0.971   | 0.96319 | 0.96214 | 0.96847 | 0.00645 |
|         | 10       | 0.97359             | 1.02312 | 0.9951  | 0.99958 | 1.00822 | 0.99992 | 0.01819 |
| Ni      | 1        | 0.73245             | 0.78575 | 0.81633 | 0.68059 | 0.6533  | 0.73368 | 0.06860 |
|         | 2        | 0.79886             | 0.88537 | 0.84698 | 0.74807 | 0.73169 | 0.80219 | 0.06488 |
|         | 3        | 0.87943             | 0.9191  | 0.87063 | 0.79156 | 0.79213 | 0.85057 | 0.05663 |
|         | 4        | 0.84483             | 0.92625 | 0.85717 | 0.8404  | 0.82571 | 0.85887 | 0.03931 |
|         | 5        | 0.92792             | 0.92919 | 0.88466 | 0.86443 | 0.86185 | 0.89361 | 0.03310 |
|         | 10       | 0.94858             | 0.98121 | 0.90292 | 0.90988 | 0.9068  | 0.92988 | 0.03407 |
| Co      | 1        | 0.56258             | 0.63224 | 0.65772 | 0.55206 | 0.50508 | 0.58194 | 0.06214 |
|         | 2        | 0.64869             | 0.73422 | 0.6957  | 0.62715 | 0.58869 | 0.65889 | 0.05716 |
|         | 3        | 0.74073             | 0.77922 | 0.73037 | 0.67874 | 0.66041 | 0.71789 | 0.04816 |
|         | 4        | 0.72521             | 0.79604 | 0.72648 | 0.73242 | 0.70154 | 0.73634 | 0.03540 |
|         | 5        | 0.80229             | 0.80633 | 0.75881 | 0.76033 | 0.74305 | 0.77416 | 0.02838 |
|         | 10       | 0.83893             | 0.87046 | 0.79254 | 0.81937 | 0.80303 | 0.82487 | 0.03094 |
| Mn      | 1        | 0.18081             | 0.20421 | 0.22817 | 0.22234 | 0.18993 | 0.20509 | 0.02031 |
|         | 2        | 0.2501              | 0.25336 | 0.25247 | 0.28675 | 0.26182 | 0.2609  | 0.01511 |
|         | 3        | 0.32075             | 0.2899  | 0.28386 | 0.34473 | 0.33325 | 0.31450 | 0.02669 |
|         | 4        | 0.32991             | 0.31156 | 0.29437 | 0.39923 | 0.37753 | 0.34252 | 0.04438 |
|         | 5        | 0.37395             | 0.32914 | 0.3151  | 0.4266  | 0.41807 | 0.37257 | 0.05045 |
|         | 10       | 0.38024             | 0.37762 | 0.34605 | 0.49074 | 0.4812  | 0.41517 | 0.06610 |
| Fe      | 1        | 0.07277             | 0.12247 | 0.11102 | 0.14909 | 0.17007 | 0.12508 | 0.03722 |
|         | 2        | 0.01803             | 0.03946 | 0.03205 | 0.07709 | 0.08575 | 0.05048 | 0.02944 |
|         | 3        | 8.5E-04             | 0.01665 | 0.01305 | 0.03871 | 0.03841 | 0.02154 | 0.01661 |
|         | 4        | 6.3E-05             | 0.00433 | 0.00548 | 0.01379 | 0.01344 | 0.00742 | 0.00600 |
|         | 5        | 8.2E-05             | 0.00269 | 0.00328 | 0.00501 | 0.00329 | 0.00287 | 0.00178 |
|         | 10       | 0.00209             | -0.0019 | 0.00318 | 0.00144 | 0.0014  | 0.00125 | 0.00188 |
